# Supplementary material for: Phytochemical Characterization of Five Edible Purple-Reddish Vegetables: Anthocyanins, Flavonoids, and Phenolic Acid Derivatives
Source: MDPI journal article supplement (doi:10.3390/molecules24081536), 2019-04-18
Supplement: s1 [file s1]

# Supporting Information

Article

## Phytochemical Characterization of Five Edible Purple-Reddish Vegetables: Anthocyanins, Flavonoids, and Phenolic Acid Derivatives

Alexandra D. Frond <sup>1,†</sup>, Cristian I. Iuhas <sup>2,†</sup>, Ioana Stirbu <sup>1</sup>, Loredana Leopold <sup>1</sup>, Sonia Socaci <sup>1</sup>, Stănilă Andreea <sup>1</sup>, Huseyin Ayvaz <sup>3</sup>, Socaciu Andreea <sup>2</sup>, Socaciu Mihai <sup>2</sup>, Socaciu Carmen <sup>1</sup> and Zorița Diaconeasa <sup>1,\*</sup>

<sup>1</sup> Faculty of Food Science and Technology, University of Agricultural Sciences and Veterinary Medicine Cluj-Napoca, 3-5 Calea Manastur, Cluj-Napoca 400372, Romania, [frondalexandradenisa@gmail.com](mailto:frondalexandradenisa@gmail.com) (A.D.F.); [ioanaalexandrastirbu@gmail.com](mailto:ioanaalexandrastirbu@gmail.com) (I.S.); [loredana.leopold@usamvcluj.ro](mailto:loredana.leopold@usamvcluj.ro) (L.L.); [sonia.socaci@usamvcluj.ro](mailto:sonia.socaci@usamvcluj.ro) (S.S.); [andreea.stanila@usamvcluj.ro](mailto:andreea.stanila@usamvcluj.ro) (S.A.); [carmen.socaciu@usamvcluj.ro](mailto:carmen.socaciu@usamvcluj.ro) (S.C.)

<sup>2</sup> Faculty of Medicine, Iuliu Hatieganu University of Medicine and Pharmacy, Cluj-Napoca 400372, Romania, [iuhascristianoan@yahoo.co.uk](mailto:iuhascristianoan@yahoo.co.uk) (C.I.I.); [medisyn@yahoo.com](mailto:medisyn@yahoo.com) (S.A.), [socacium@yahoo.com](mailto:socacium@yahoo.com) (S.M.)

<sup>3</sup> Faculty of Engineering, Canakkale Onsekiz Mart University, Canakkale 17020, Turkey, [huseyinayvaz@comu.edu.tr](mailto:huseyinayvaz@comu.edu.tr)

\* Correspondence: [zorita.sconta@usamvcluj.ro](mailto:zorita.sconta@usamvcluj.ro); Tel.: +40-751-033-871

† These authors contributed equally to this work.

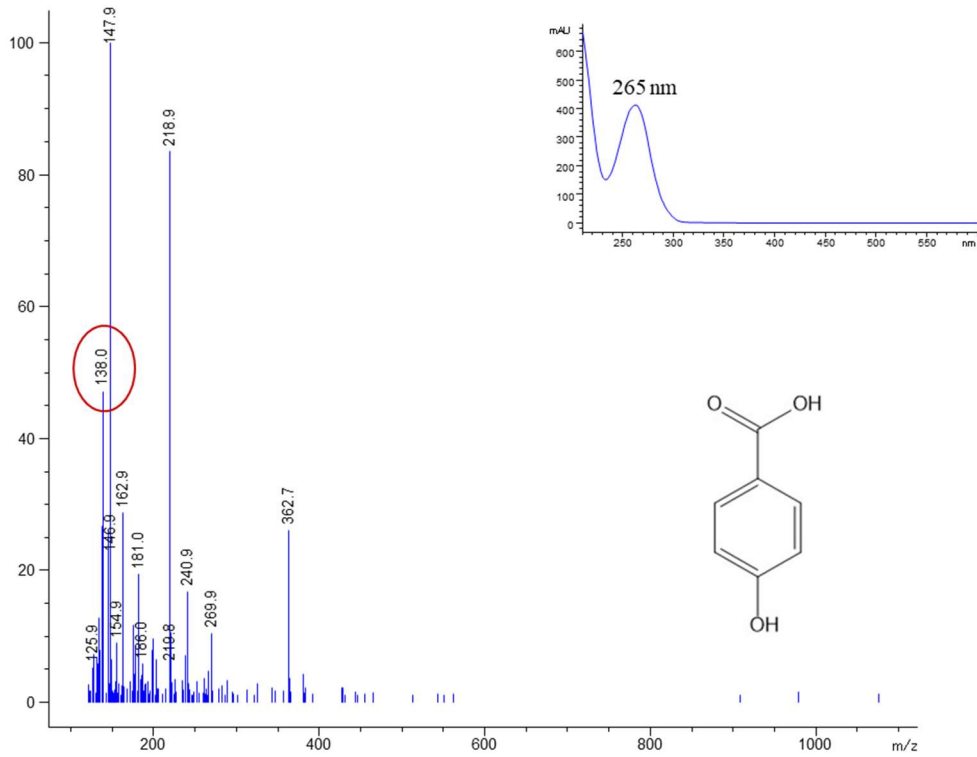

(a) peak 1  
Hydroxybenzoic acid

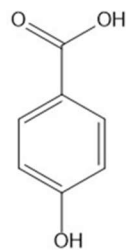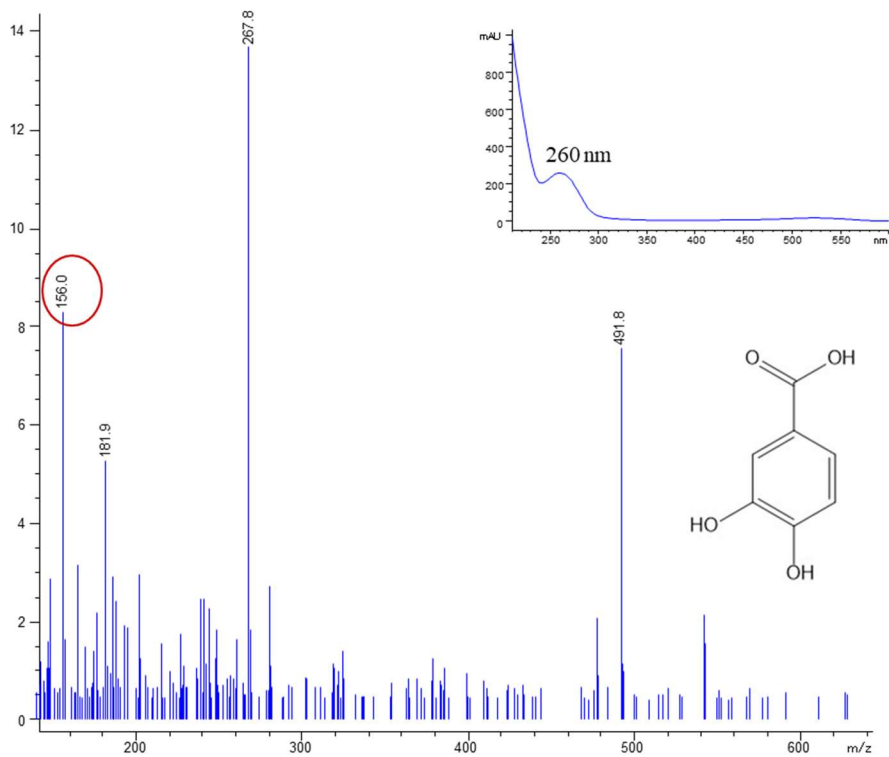

(b) peak 2  
Dihydroxybenzoic acid

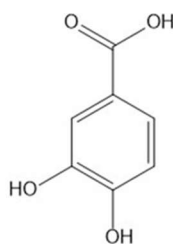

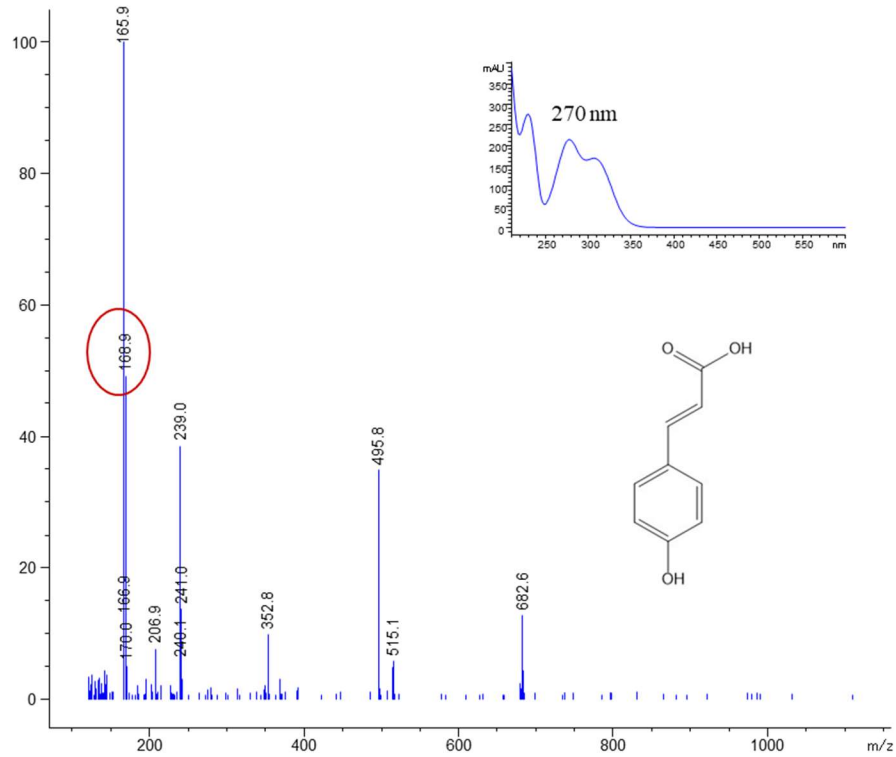

(c) peak 3  
Dihydroxy p-coumaric acid

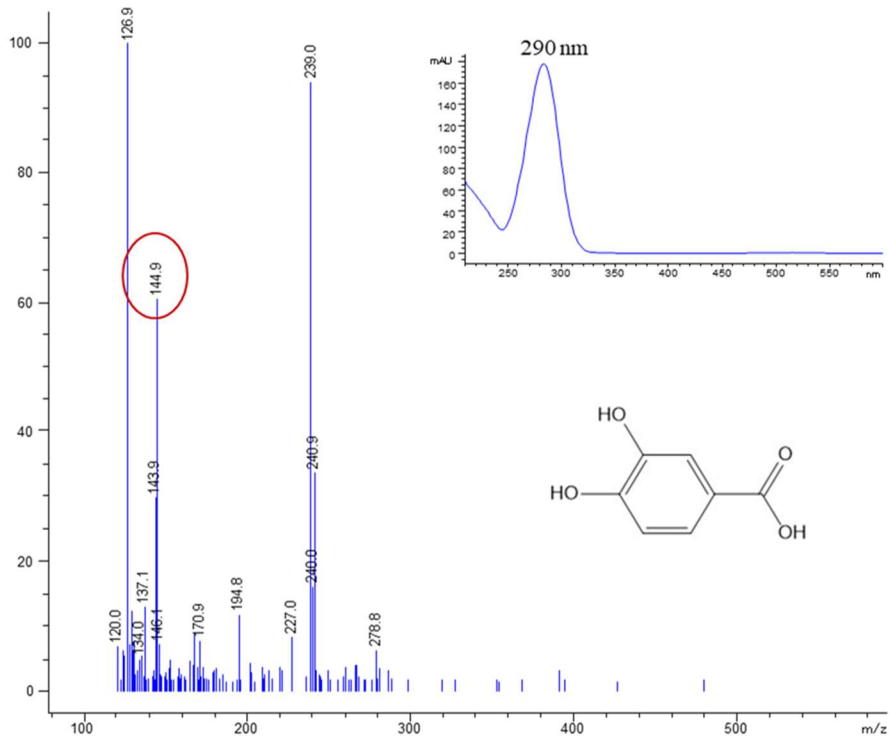

(d) peak 4  
Protocatechuic acid

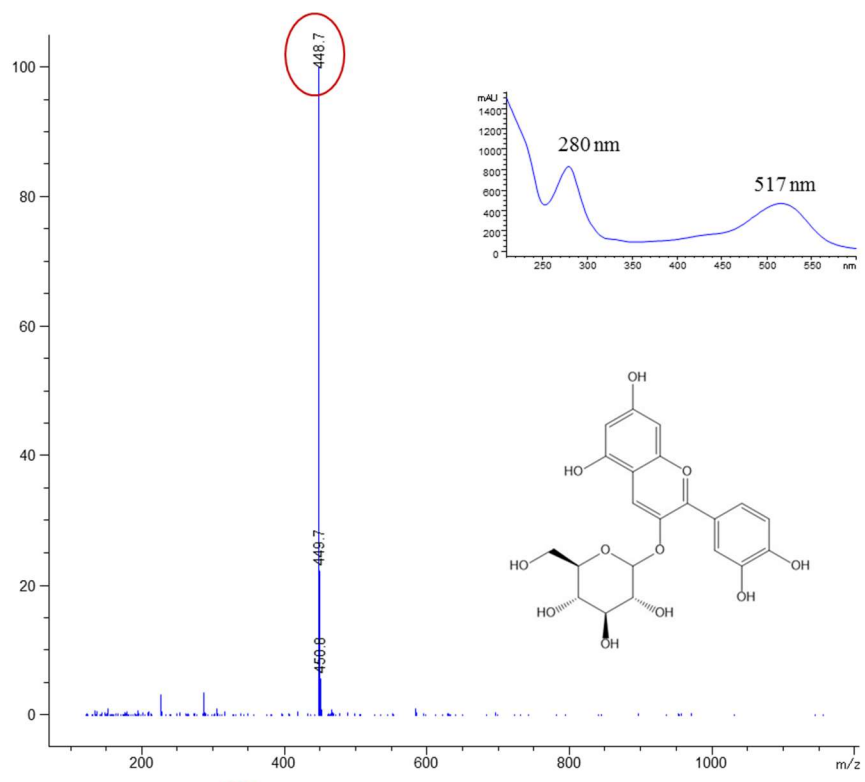

(e) peak 5  
Cyanidin-3-O-glucoside

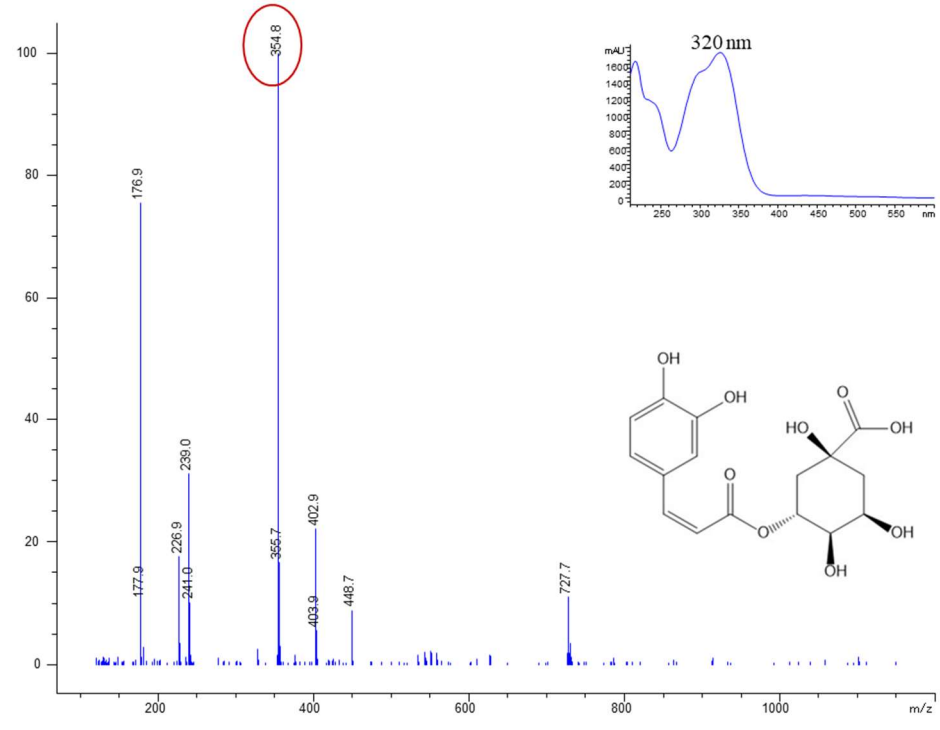

(f) peak 6  
Chlorogenic acid

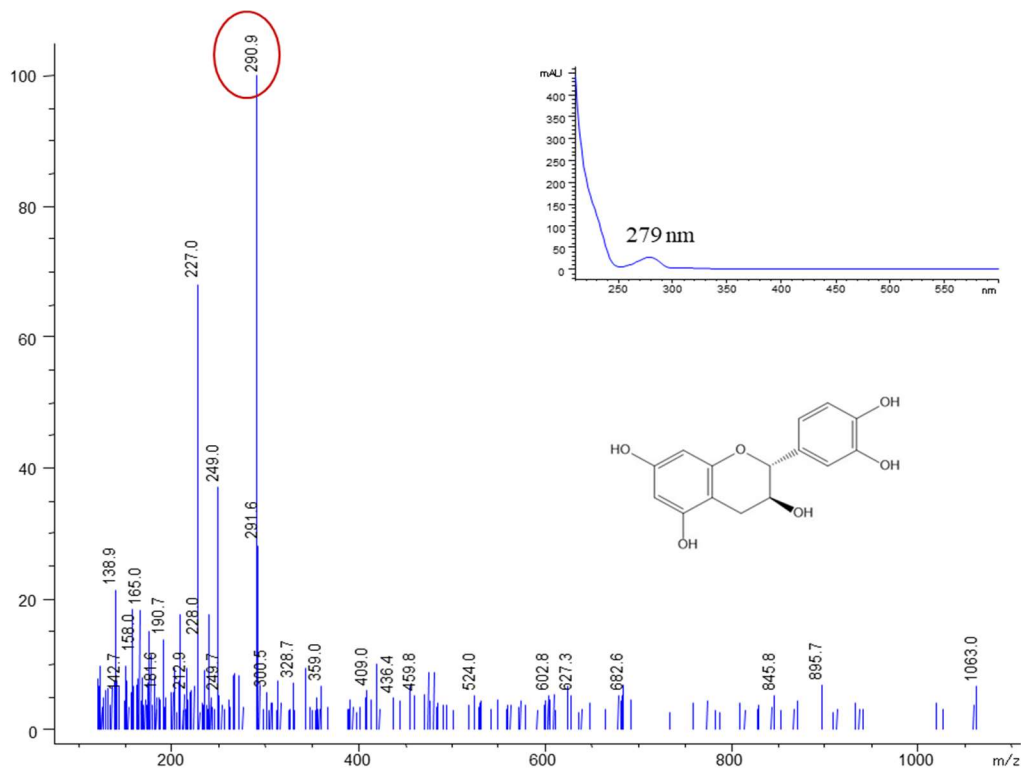

(g) peak 7  
Catechin

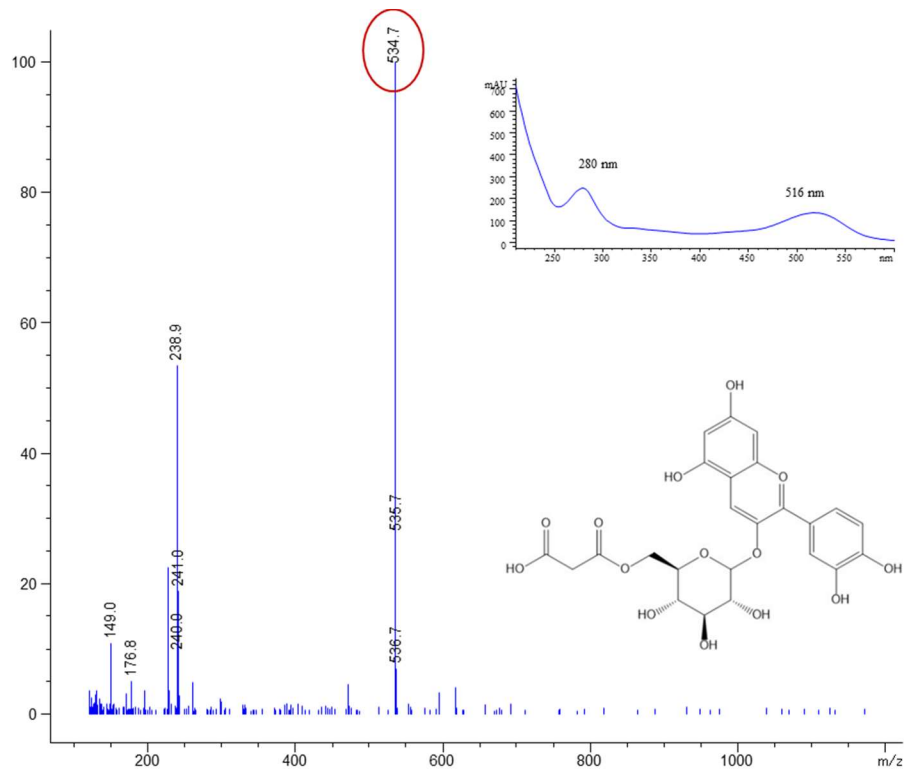

(h) peak 8  
Cyanidin-3-O-(6''-  
malonyl-glucoside)

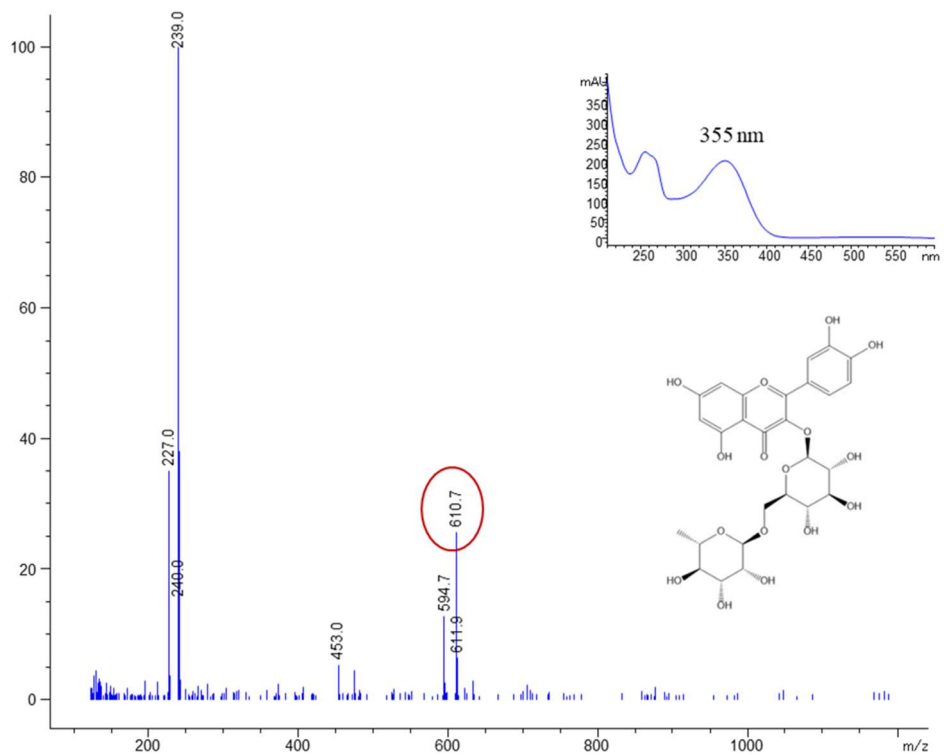

(i) peak 9  
Quercetin-3-O-rutinoside (Rutin)

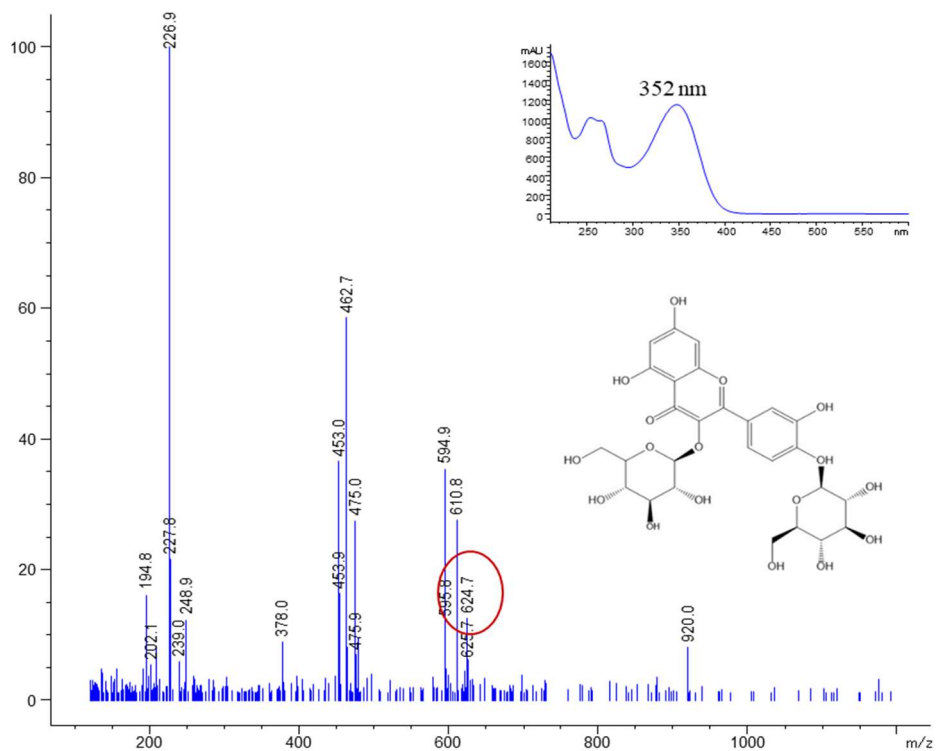

(j) peak 10  
Quercetin-3,4-O-diglucoside

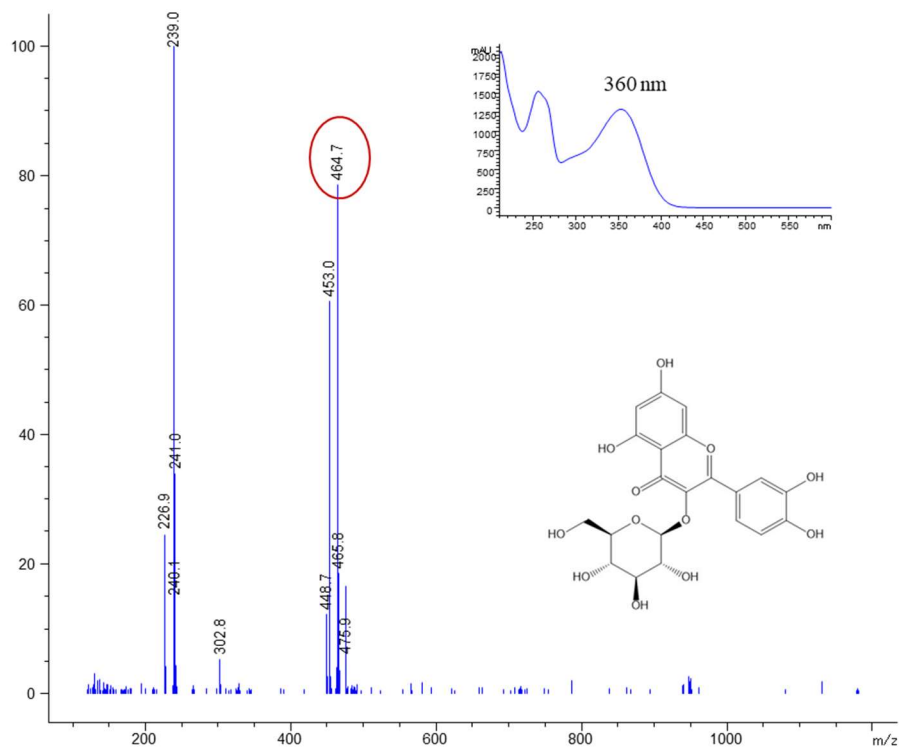

(k) peak 11  
Quercetin-3-O-  
glucoside

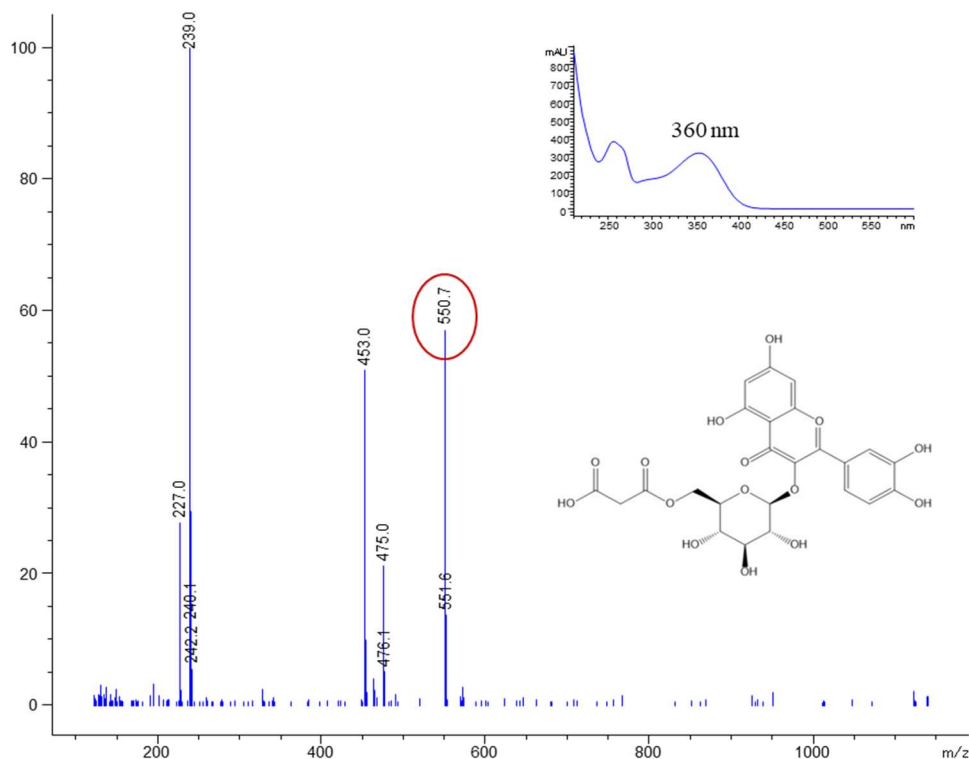

(l) peak 12  
Quercetin-3-O-(6''-  
malonyl-glucoside)

**Figure 1.** LC-MS; UV/vis scanning spectra; chemical structures of red chicory: (a) peak 1, (b) peak 2, (c) peak 3, (d) peak 4, (e) peak 5, (f) peak 6, (g) peak 7, (h) peak 8, (i) peak 9, (j) peak 10, (k) peak 11, (l) peak 12.

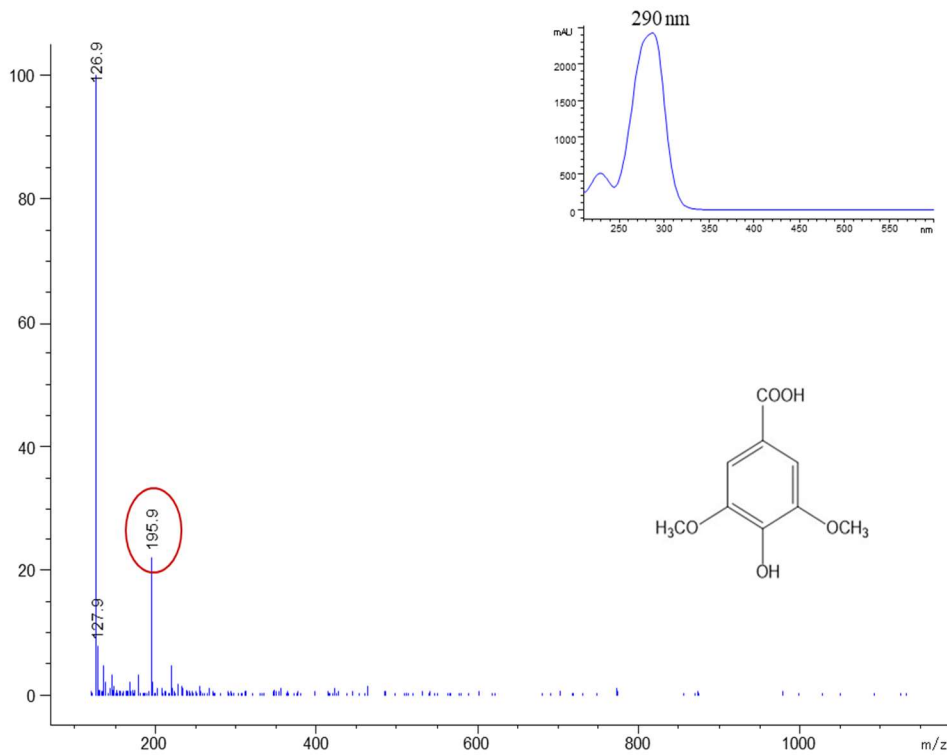

(a) peak 1  
Syringic acid

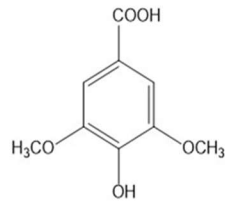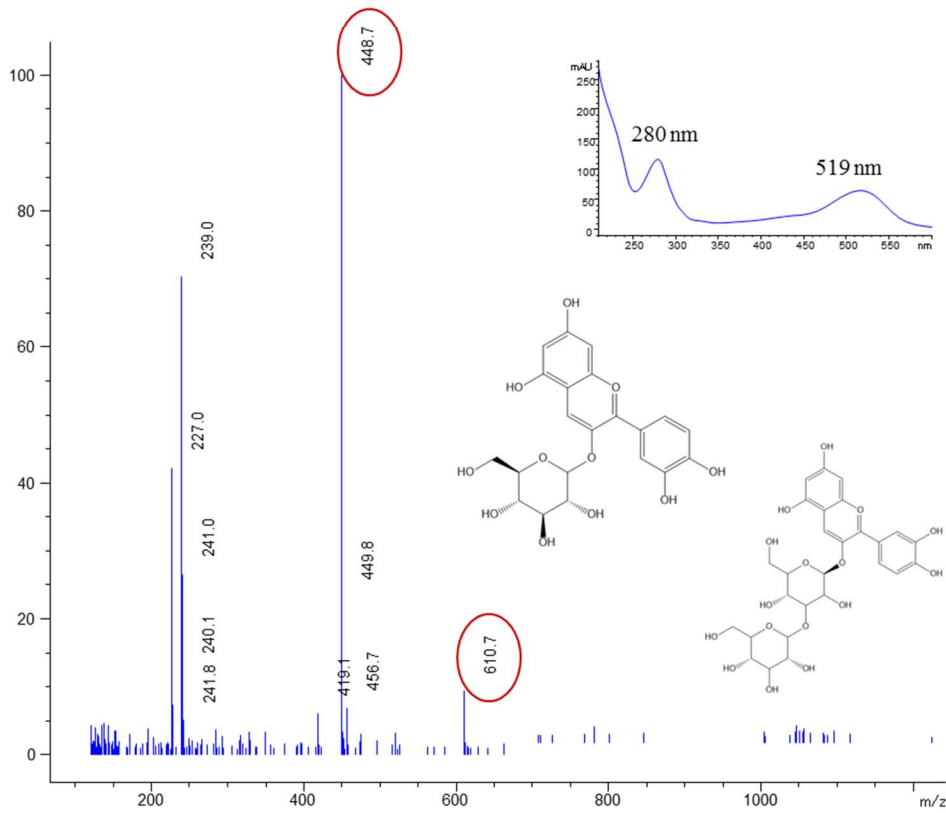

(b) peak 2  
Cyanidin-3-O-glucoside +  
Cyanidin-3-O-laminaribioside

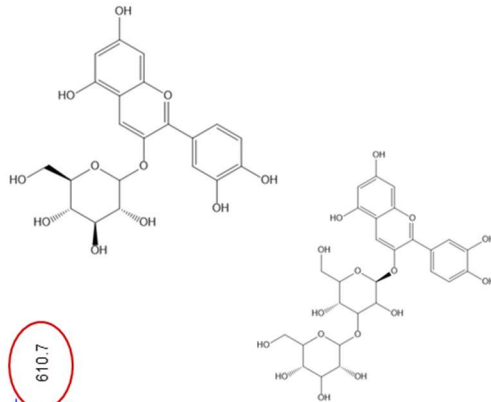



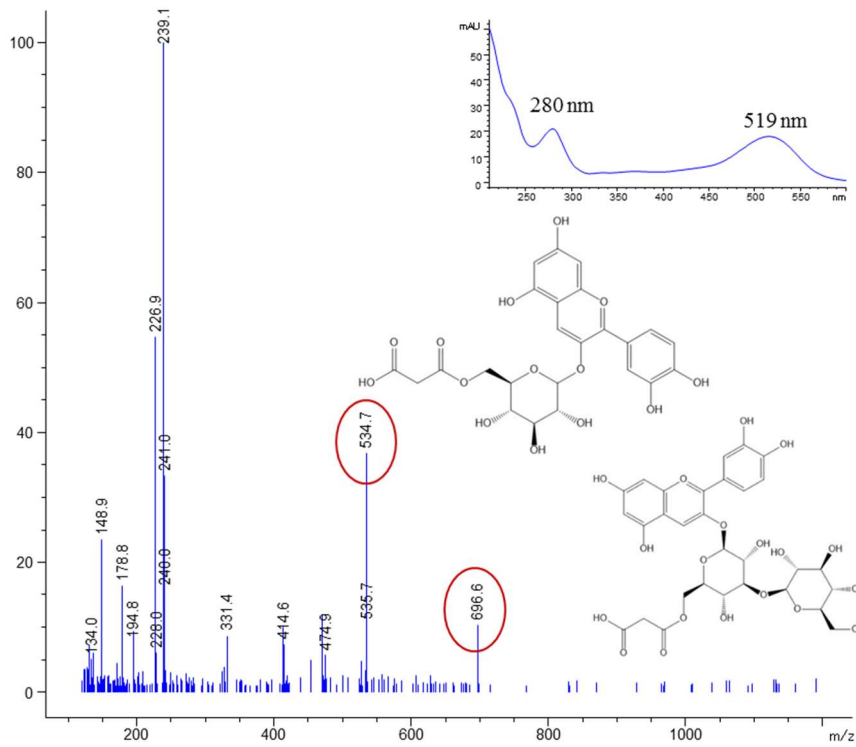

(c) peak 3  
 Cyanidin-3-(6''-malonyl-glucoside) +  
 Cyanidin-3-(6''-malonyl-laminaribioside)

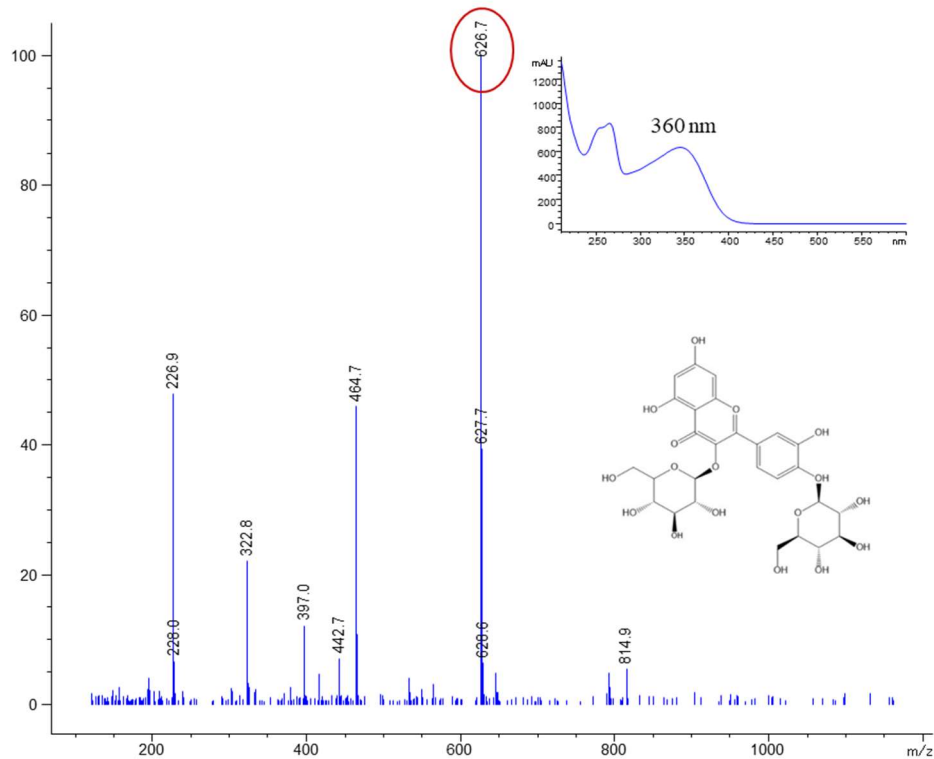

(d) peak 4  
 Quercetin-3,4-O-diglucoside

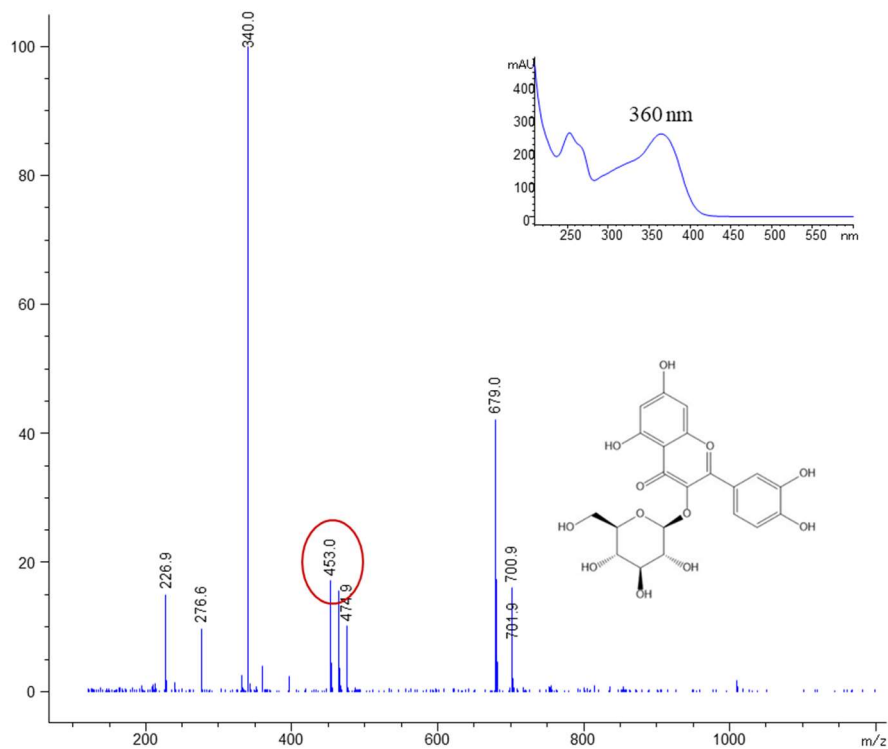

(e) peak 5  
Quercetin-3-O-  
glucoside

**Figure 2.** LC-MS; UV/VIS scanning spectra; chemical structures of red onion: (a) peak 1, (b) peak 2, (c) peak 3 (d) peak 4, (e) peak 5

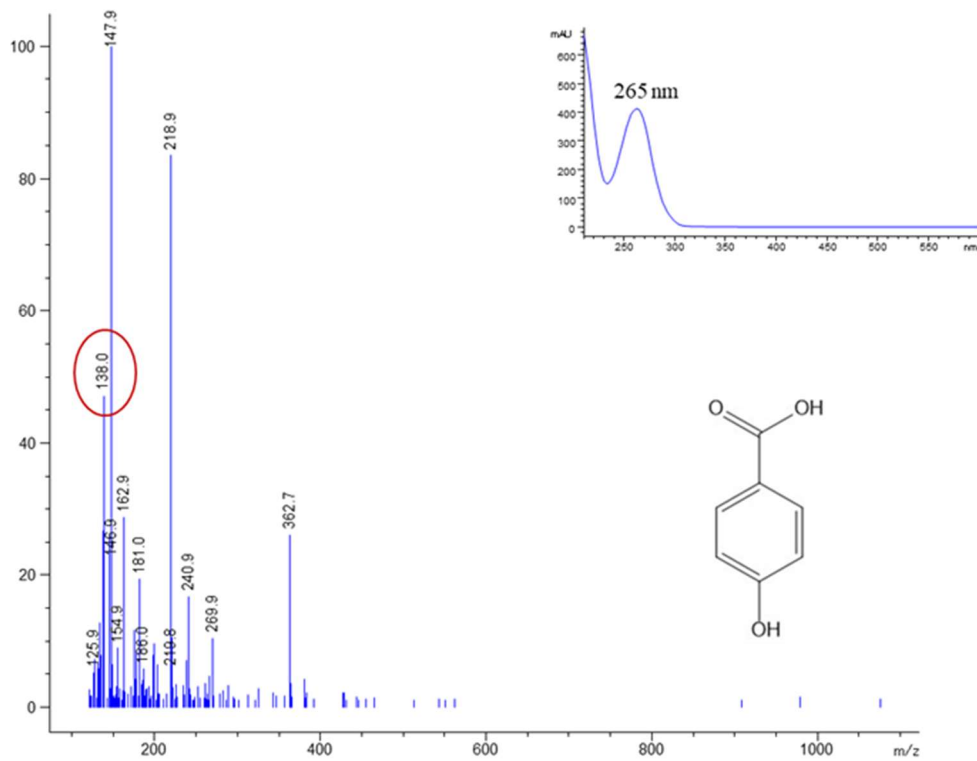

(a) peak 1  
Hydroxybenzoic acid

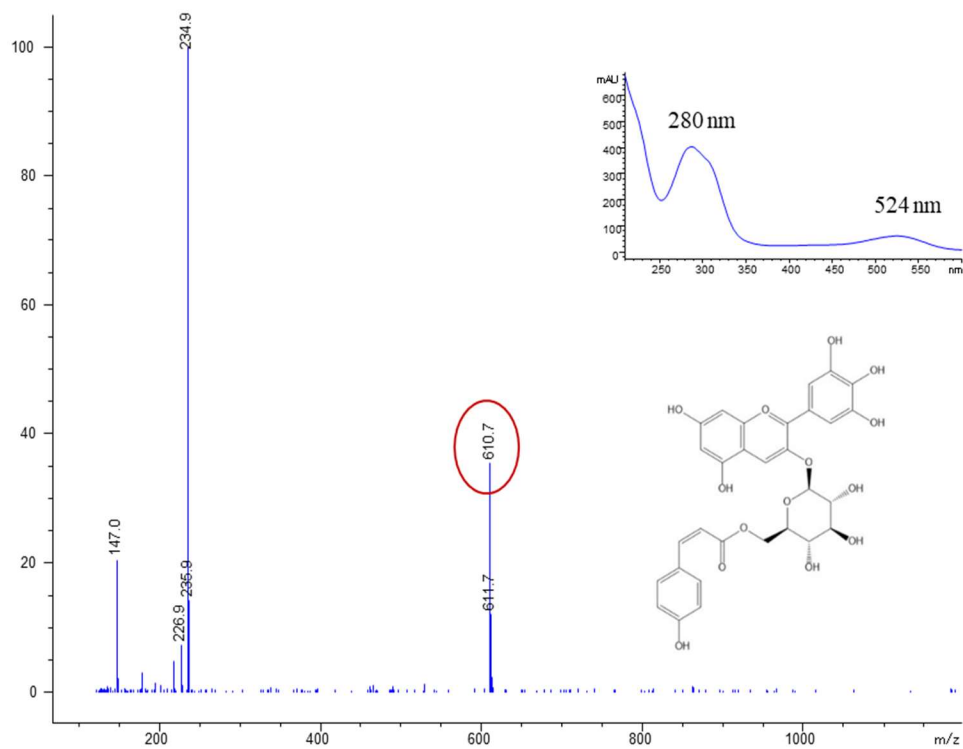

(b) peak 2  
Delphinidin-3-O-  
rutinoside)

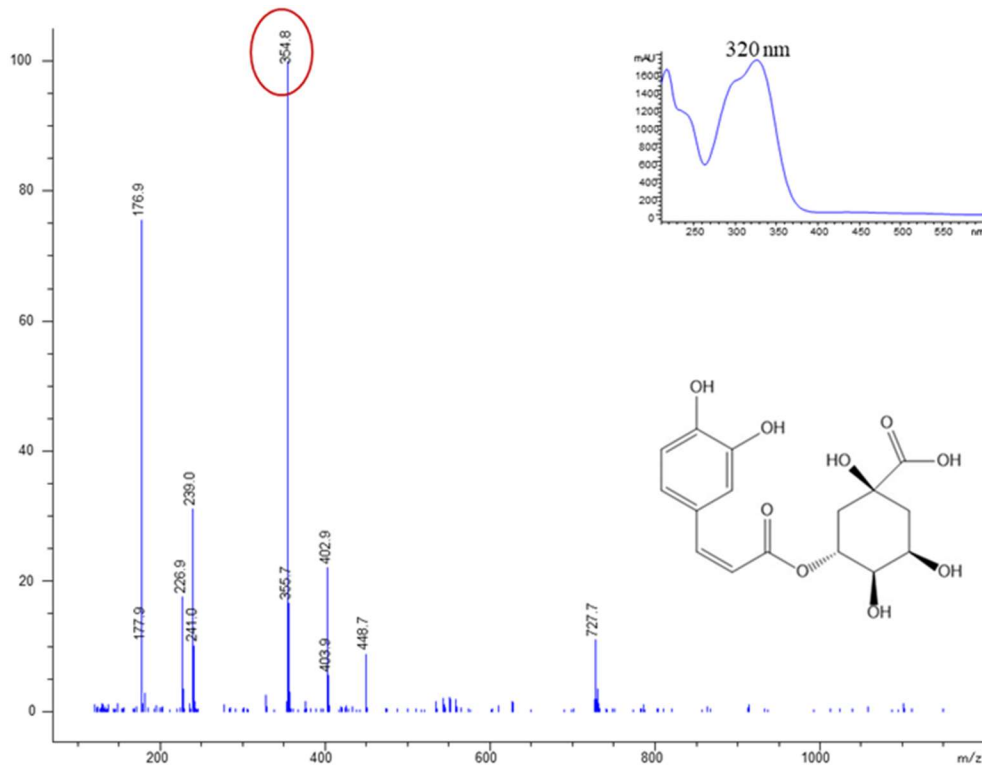

(c) peak 3  
5-Caffeoylquinic acid  
(Chlorogenic acid)

**Figure 3.** LC-MS; UV/vis scanning spectra; chemical structures of eggplant: (a) peak 1, (b) peak 2, (c) peak 3.

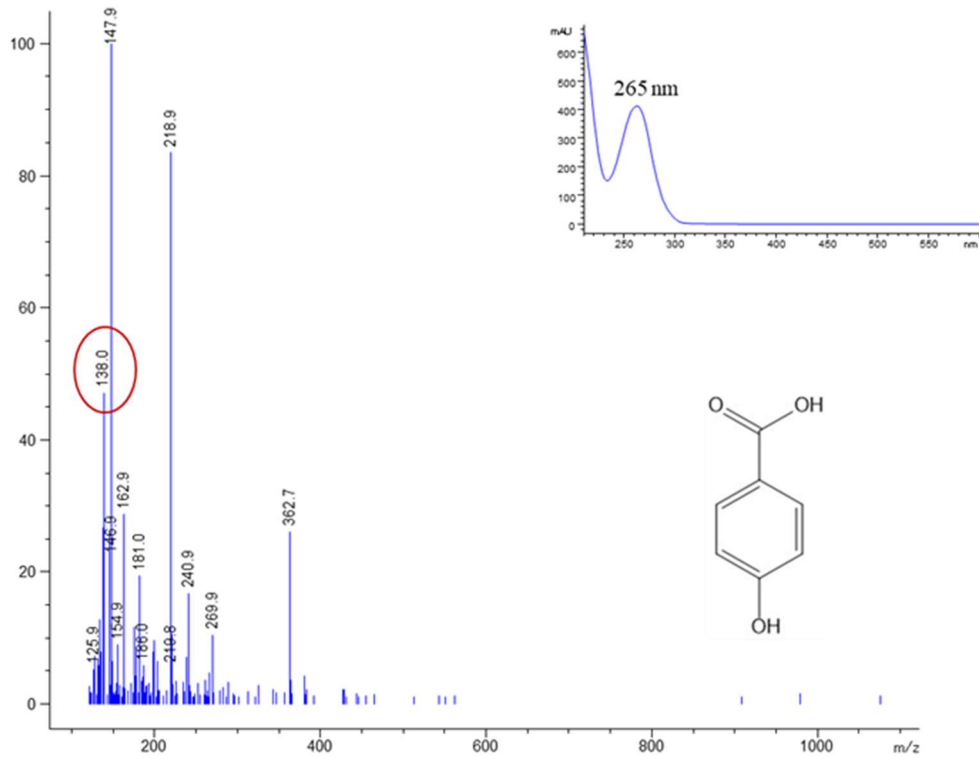

(a) peak 1  
Hydroxybenzoic acid

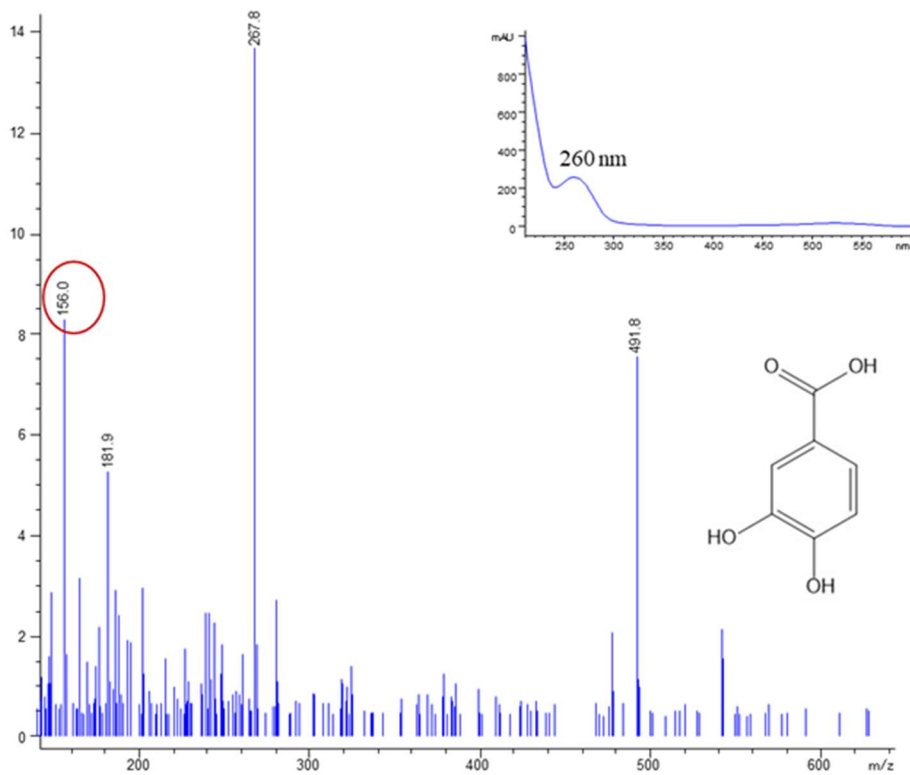

(b) peak 2  
Dihydroxybenzoic acid

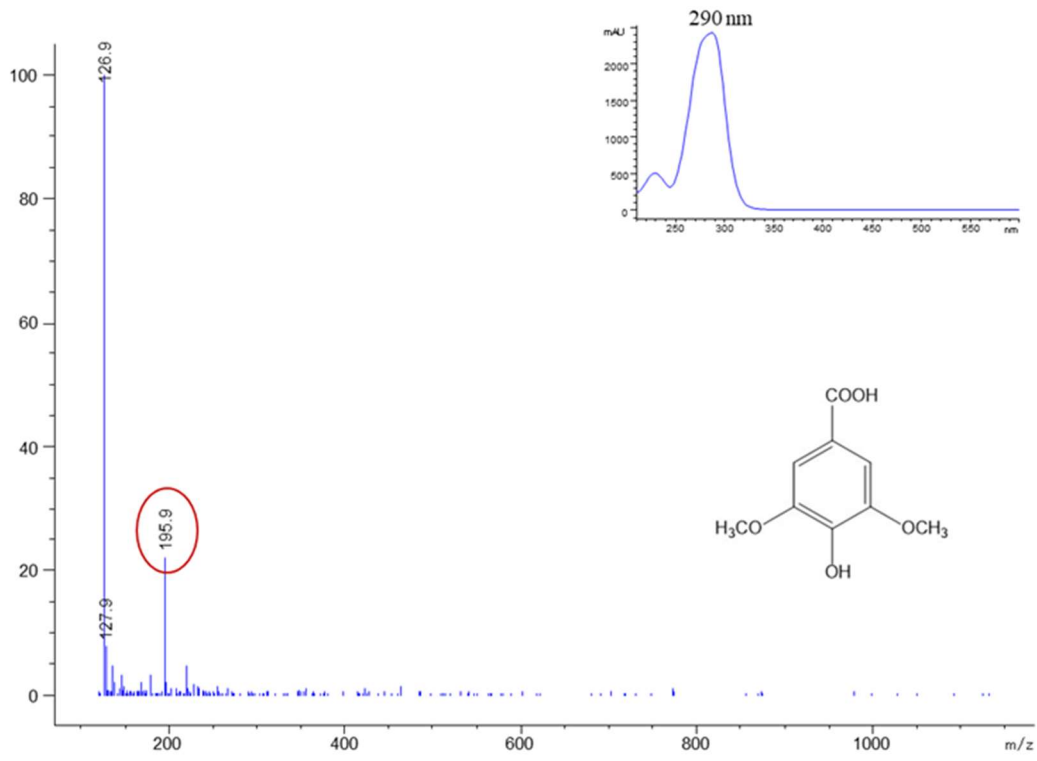

(c) peak 3  
Syringic acid

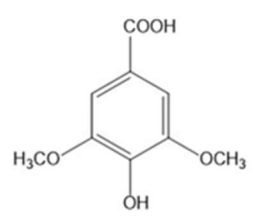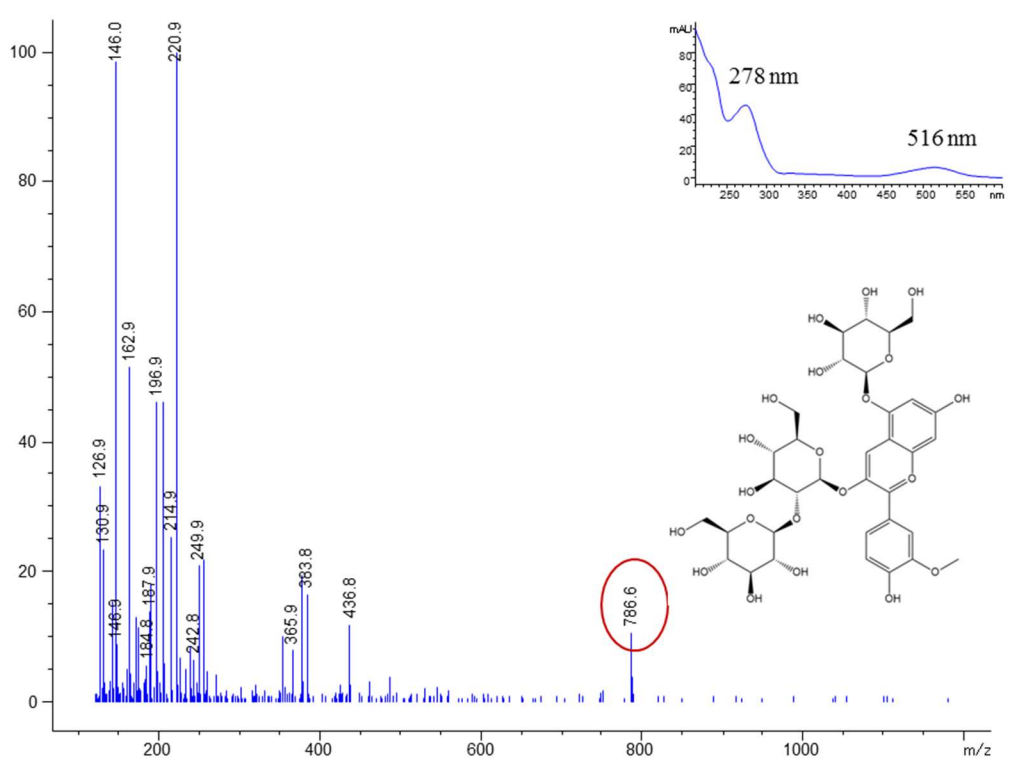

(d) peak 4  
Peonidin-3-O-sophoroside-5-O-glucoside

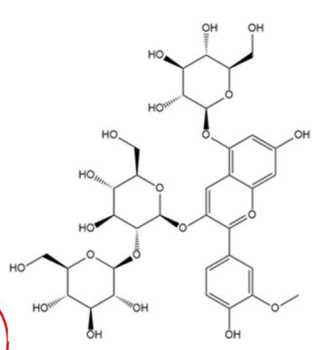

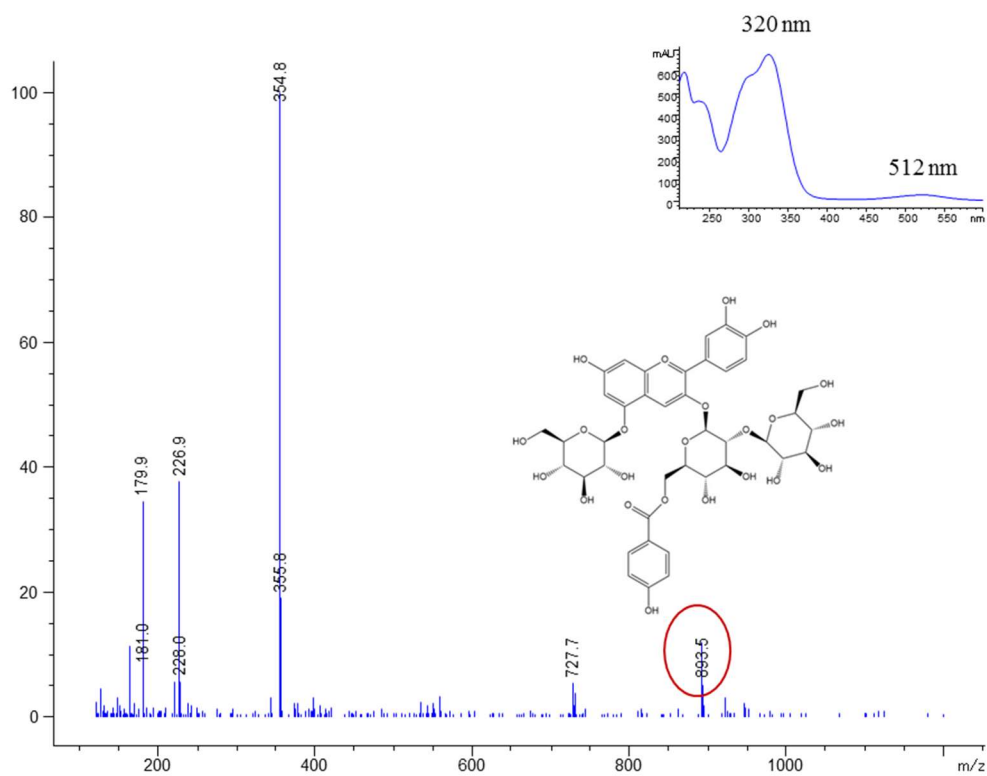

(e) peak 5  
Peonidin-3-O-glucoside

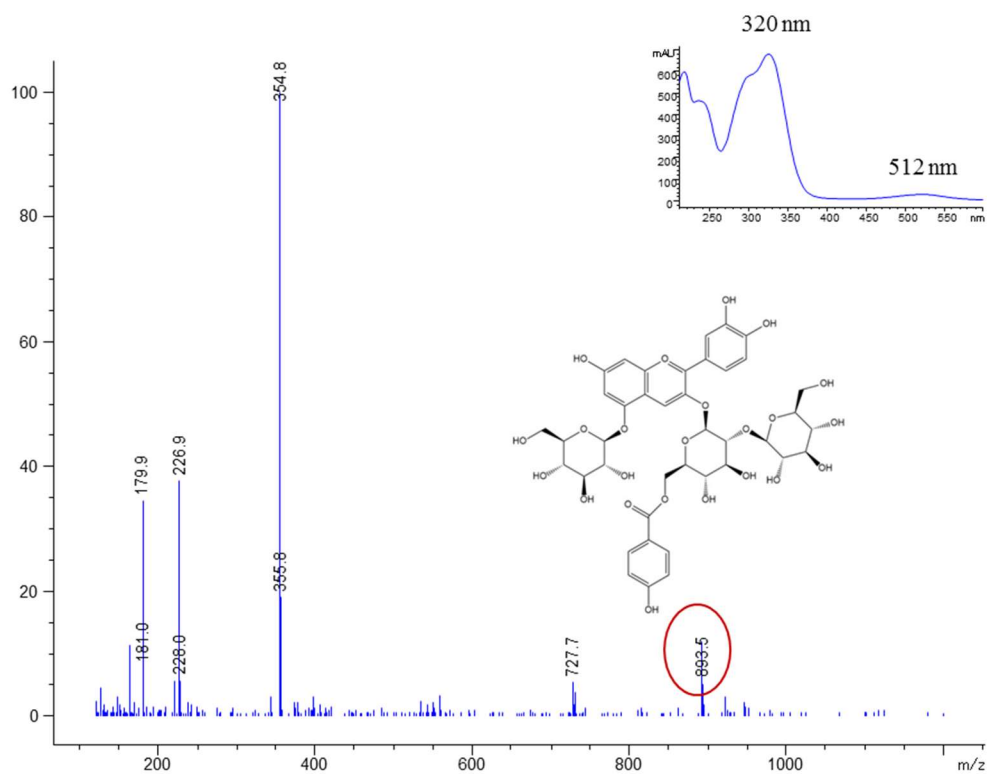

(f) peak 6  
Cyanidin-3-p-hydroxybenzoyl  
sophoroside-5-glucoside

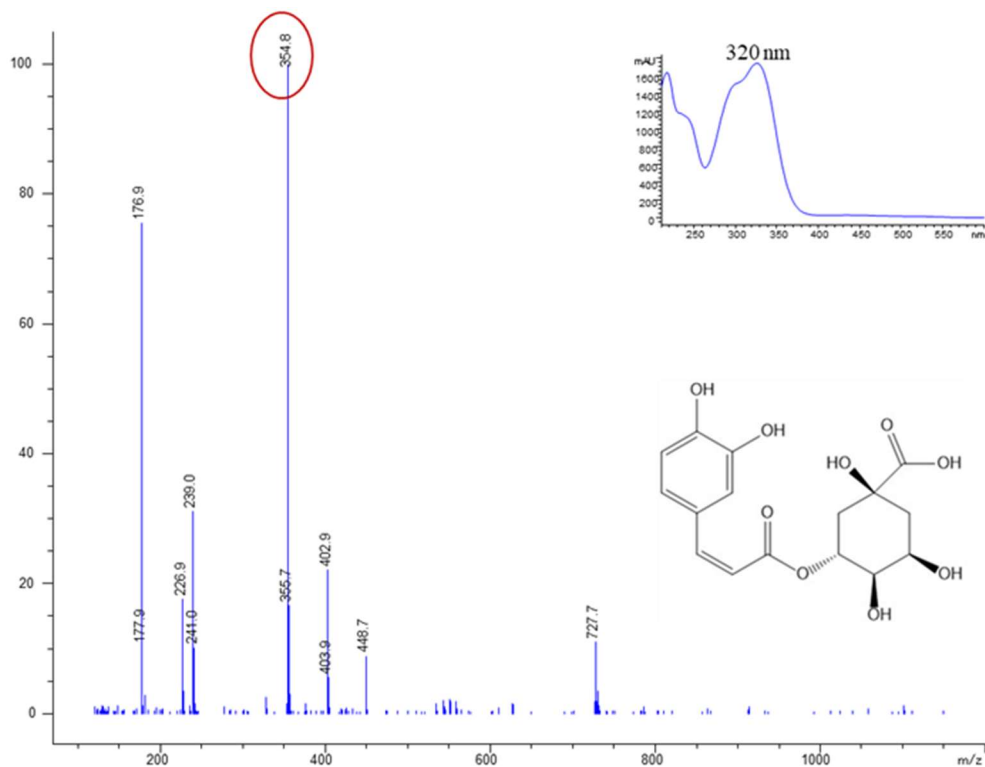

(g) peak 7  
Chlorogenic acid

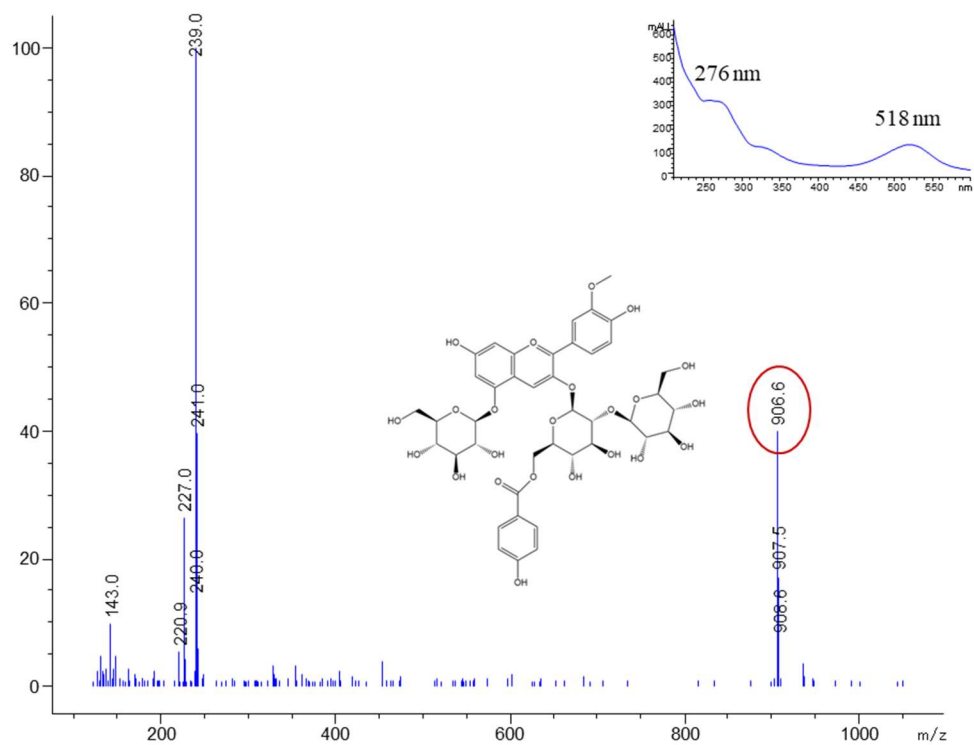

(h) peak 8  
Peonidin-3-p-  
hydroxybenzoyl  
sophoroside-5-  
glucoside

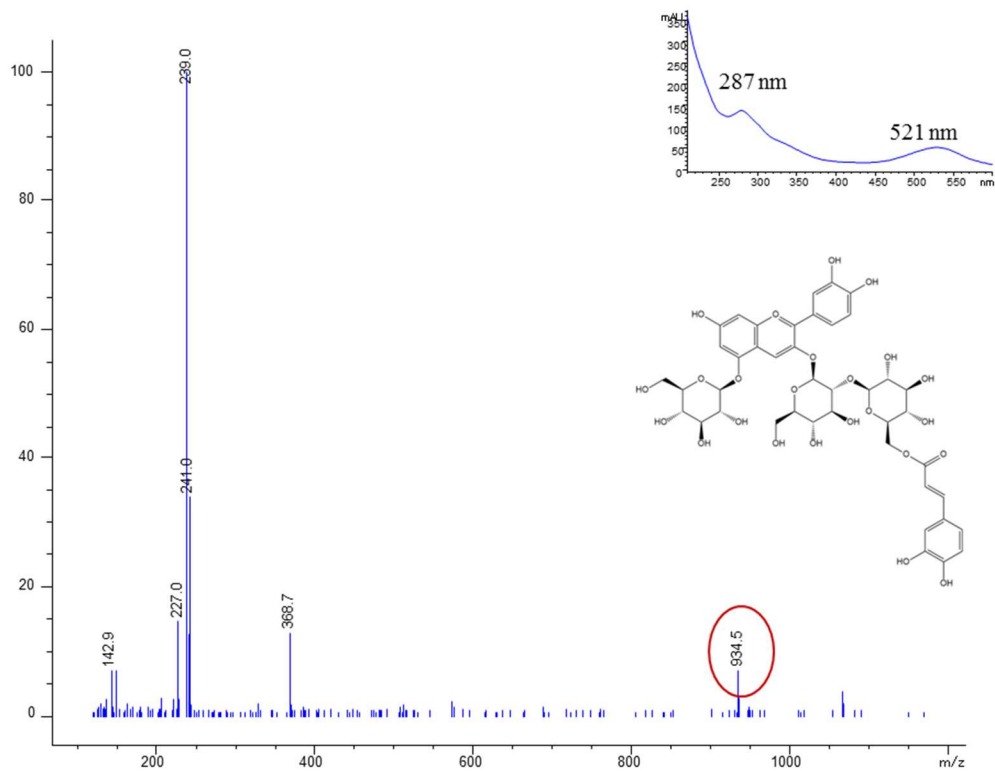

(i) peak 9  
Cyanidin-3-  
caffeoylsophoros  
ide-5-glucoside

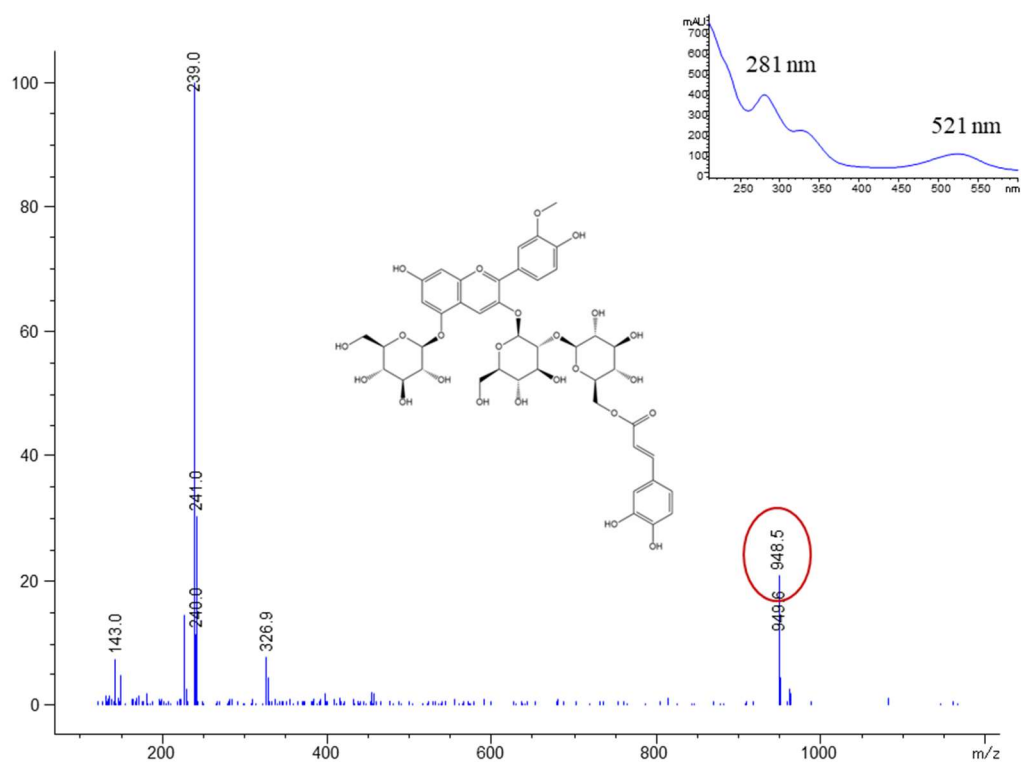

(j) peak 10  
Peonidin-3-  
caffeoylsophoros  
ide-5-glucoside



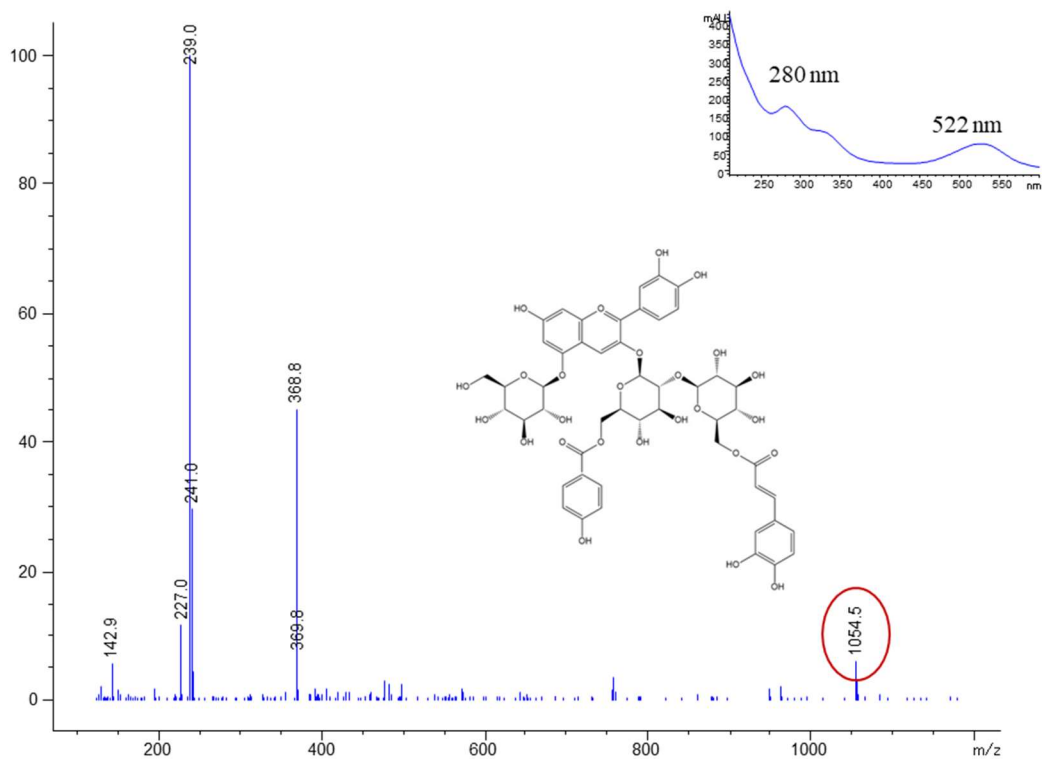

(k) peak 11  
Cyanidin-3-  
caffeoyl-p-  
hydroxybenzoyl  
sophoroside-5-  
glucoside

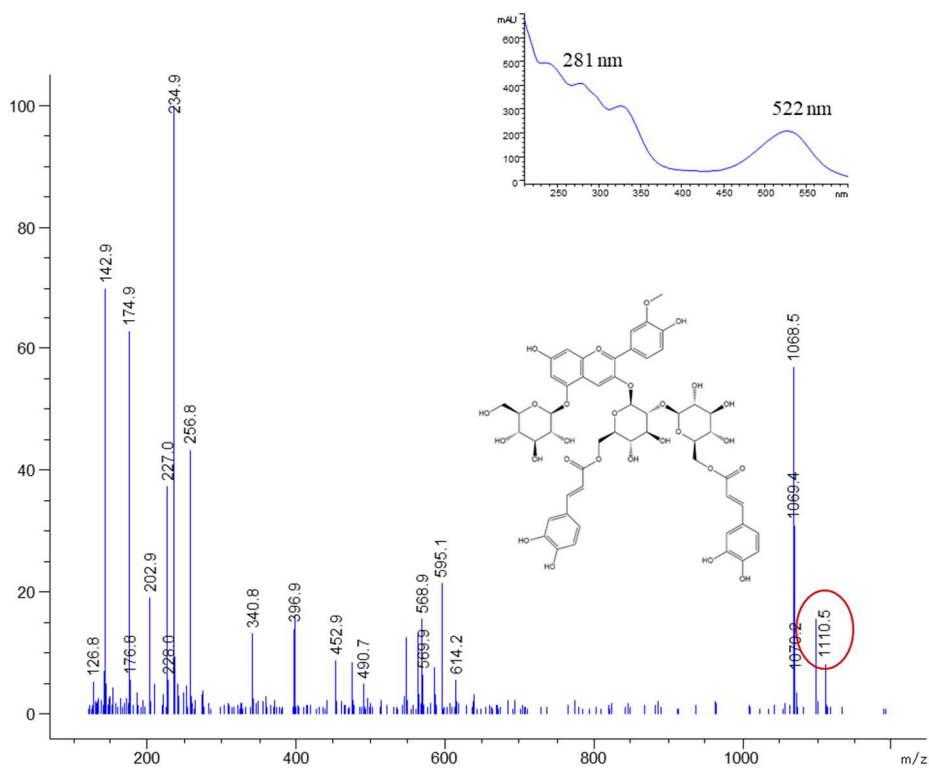

(l) peak 12  
Peonidin-3-  
dicaffeoylsophor  
oside-5-  
glucoside

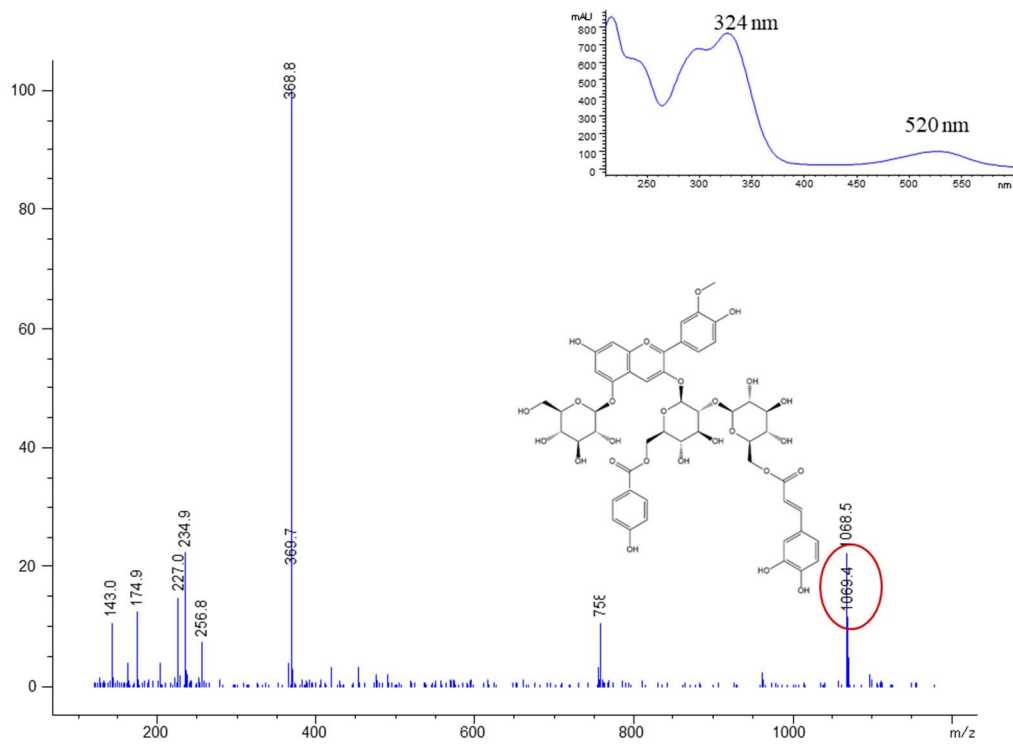

(m) peak 12  
 Peonidin-3-  
 caffeoyl-p-  
 hydroxybenzoyl  
 sophoroside-5-  
 glucoside

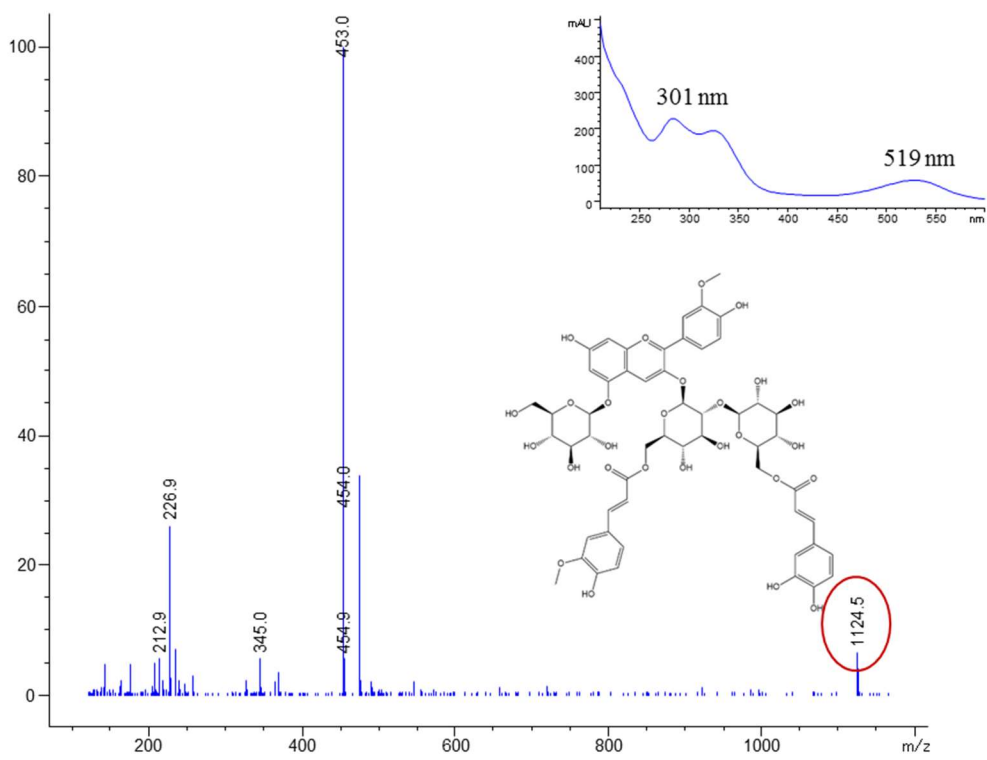

(n) peak 13  
 Peonidin-3-  
 caffeoyl-  
 feruloylsophoros  
 ide-5-glucoside

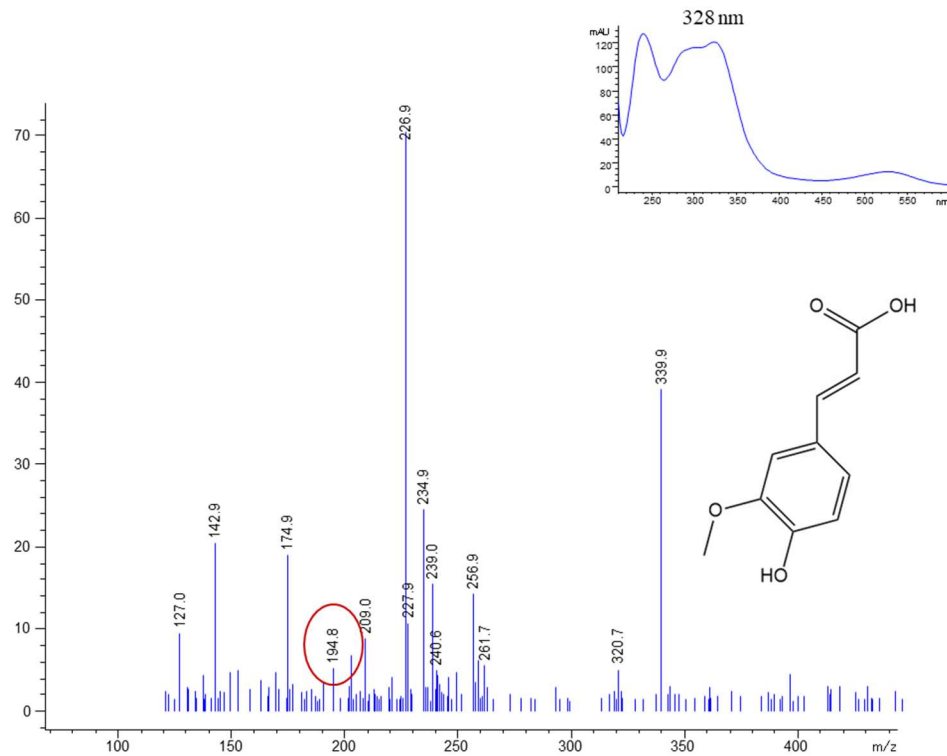

(o) peak 14  
Ferulic acid

**Figure 4.** LC-MS; UV/vis scanning spectra; chemical structures of purple sweet potato: (a) peak 1, (b) peak 2, (c) peak 3, (d) peak 4, (e) peak 5, (f) peak 6, (g) peak 7, (h) peak 8, (i) peak 9, (j) peak 10, (k) peak 11, (l) peak 12, (m) peak 12, (n) peak 13, (o) peak 14.

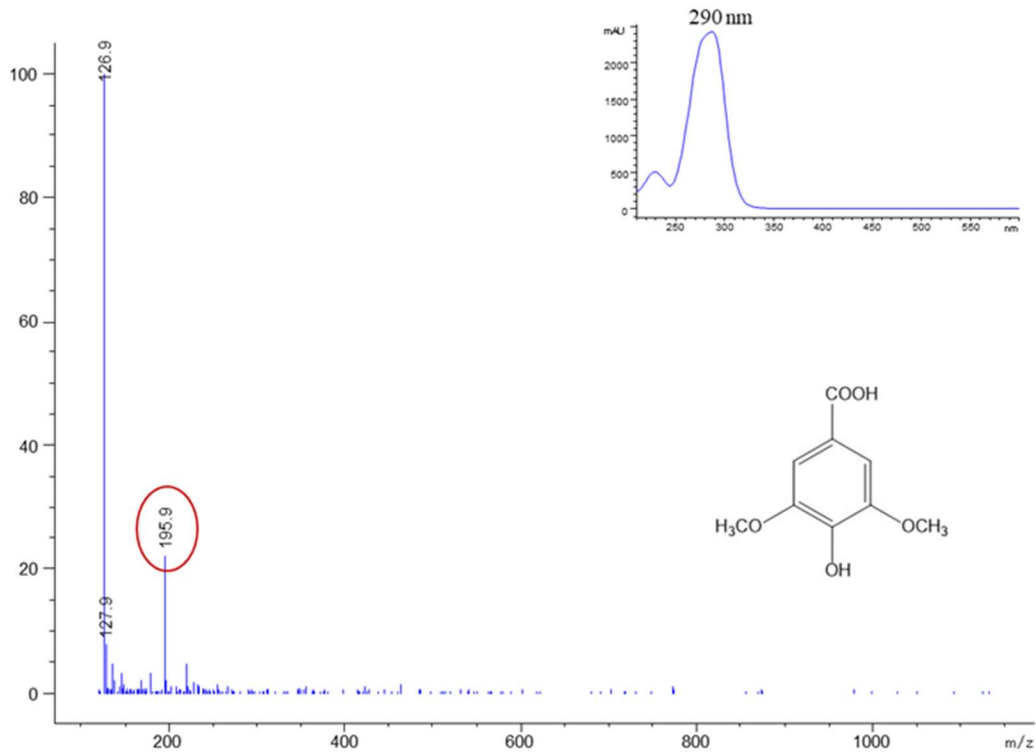

(a) peak 1  
Syringic acid

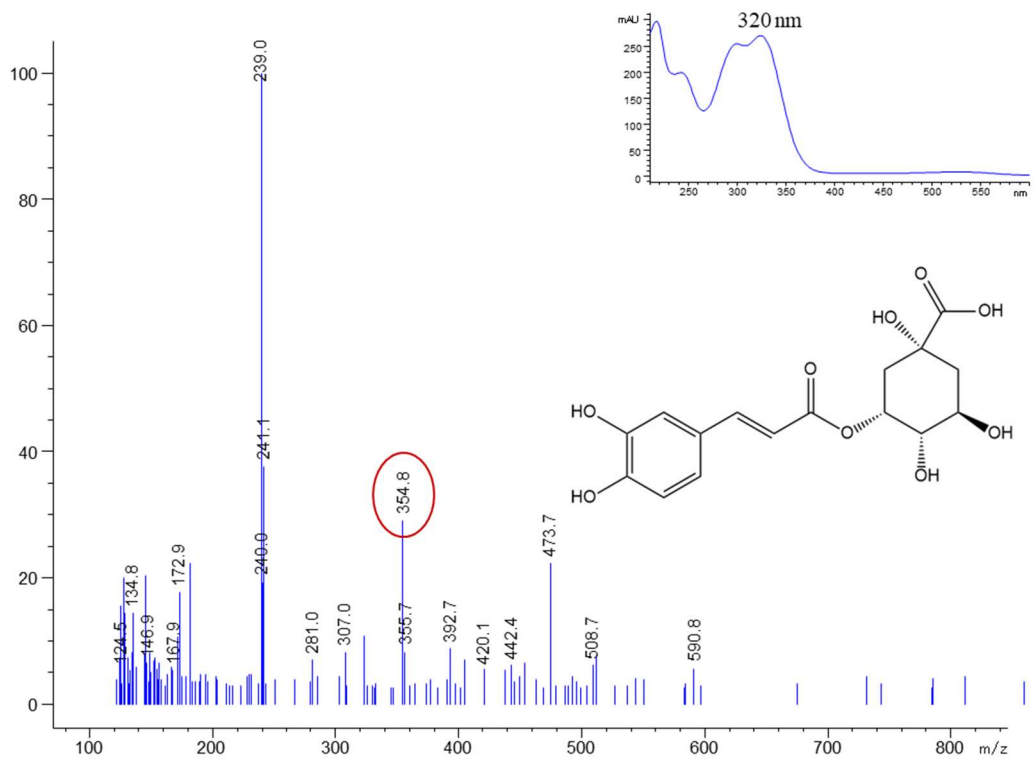

(b) peak 2  
3-Caffeoylquinic  
acid  
(Neochlorogenic  
acid)

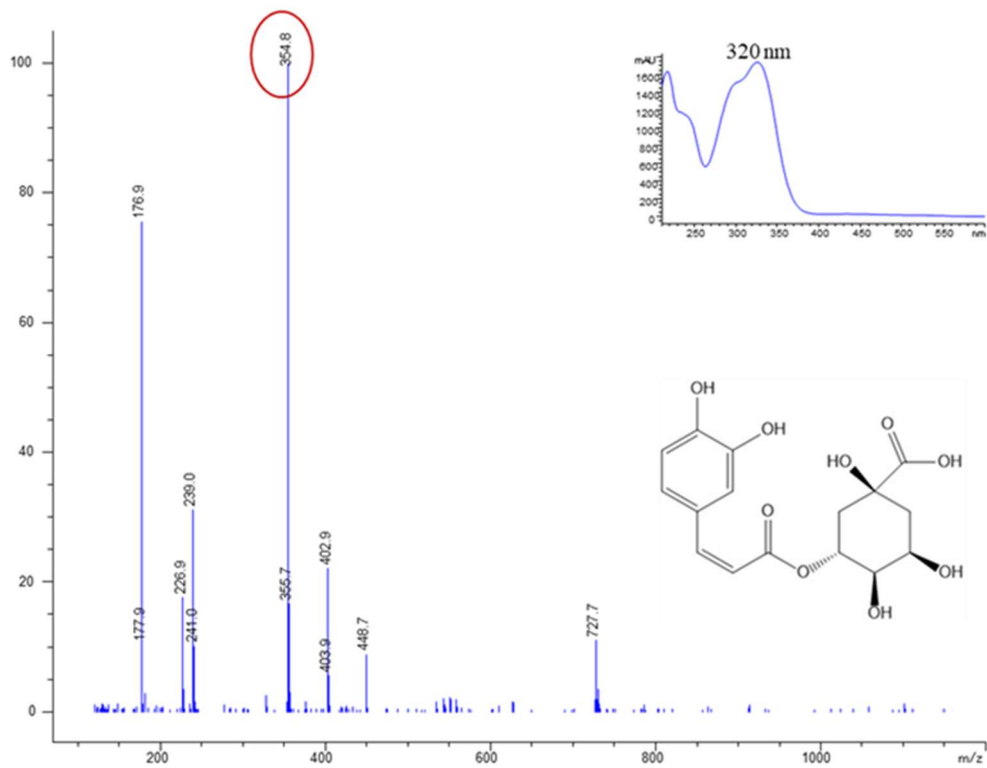

(c) peak 3  
5-Caffeoylquinic  
acid (Chlorogenic  
acid)

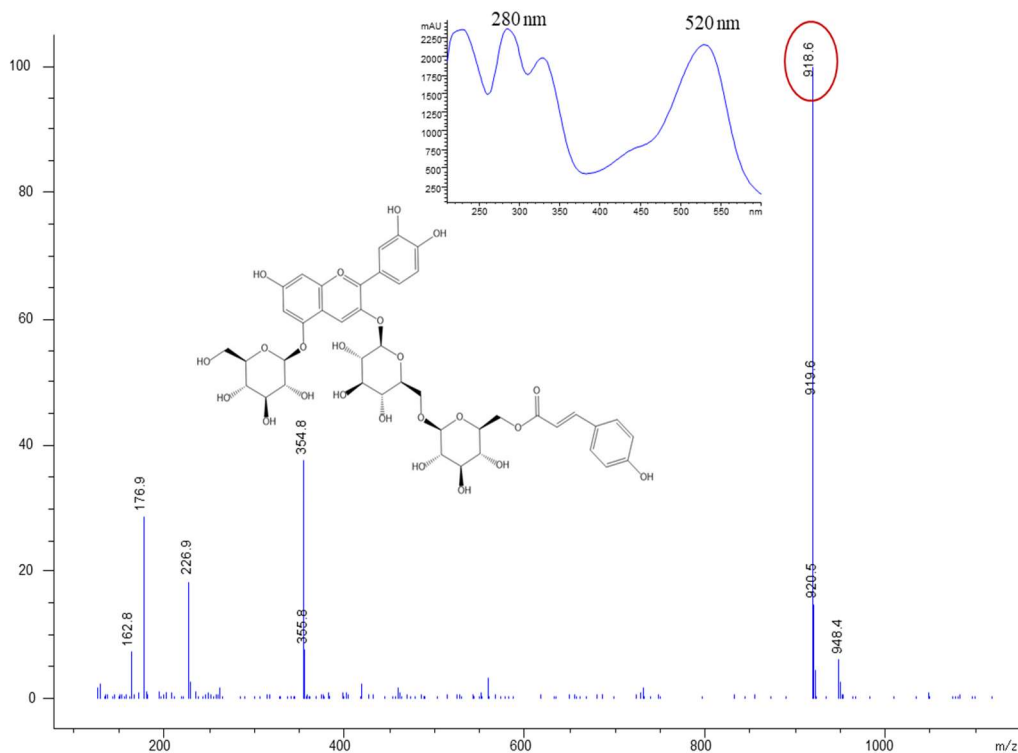

(d) peak 3  
Cyanidin-3-(p-  
coumaroyl)-  
diglucoside-5-  
glucoside

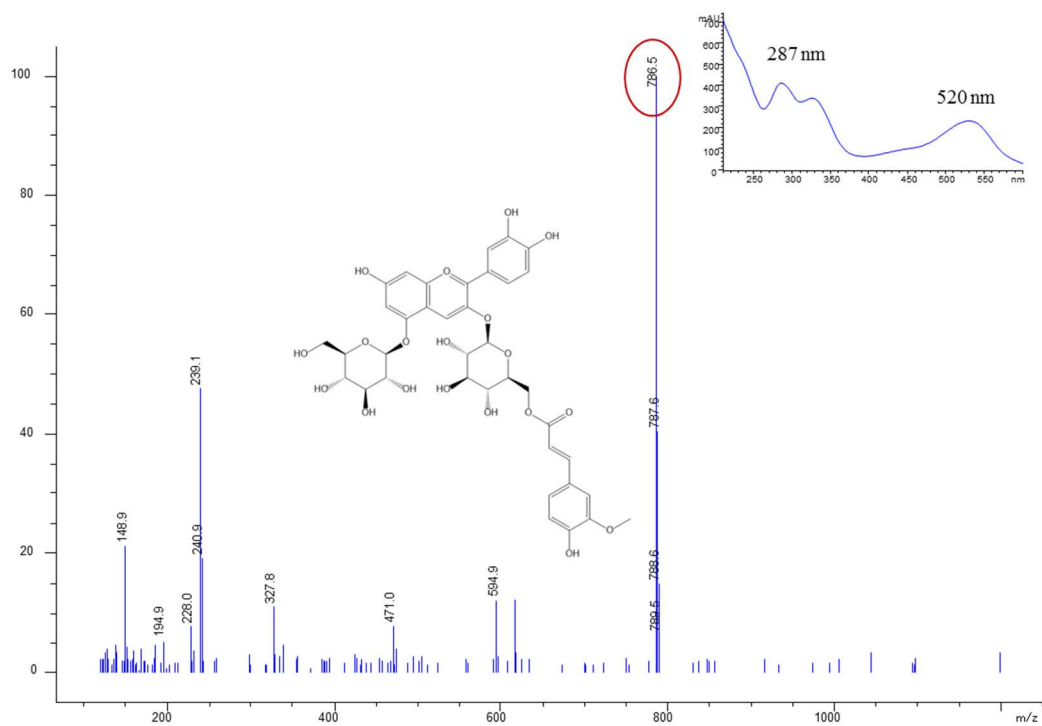

(e) peak 4  
Cyanidin-3-  
(feruloyl)-glucoside-  
5-glucoside

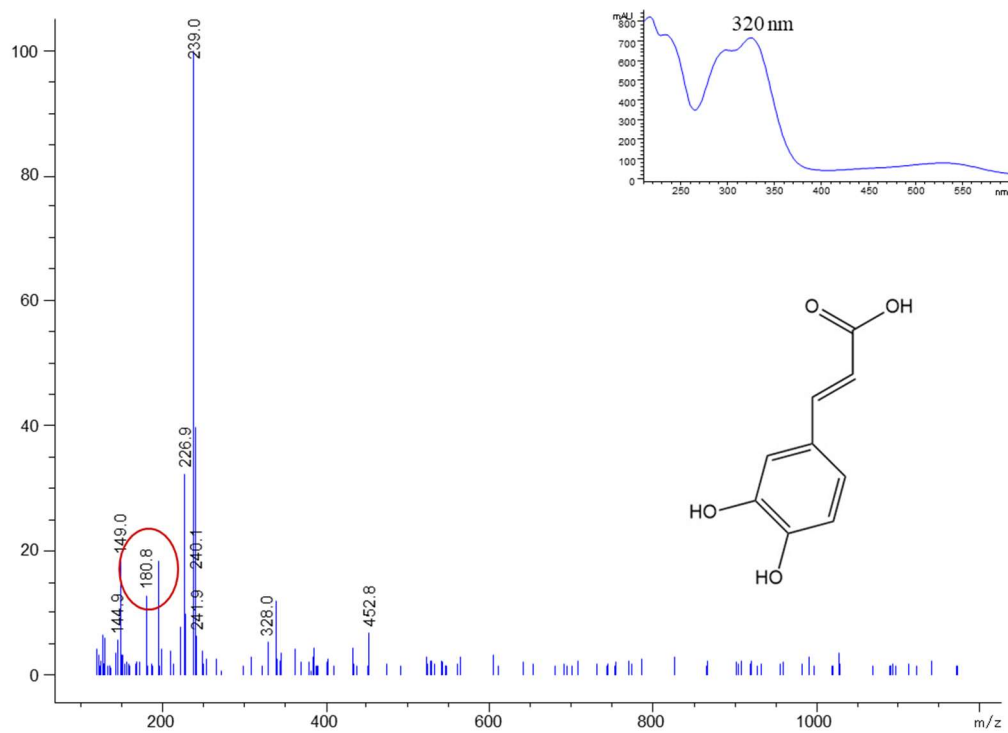

(f) peak 5  
Caffeic acid

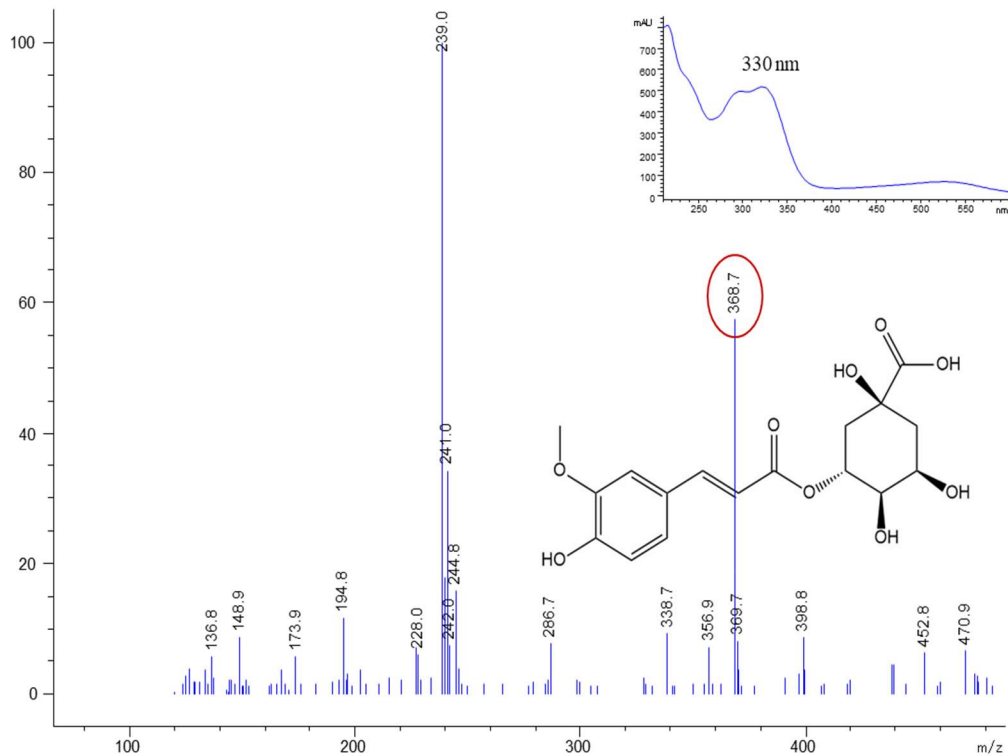

(g) peak 6  
Feruloylquinic acid

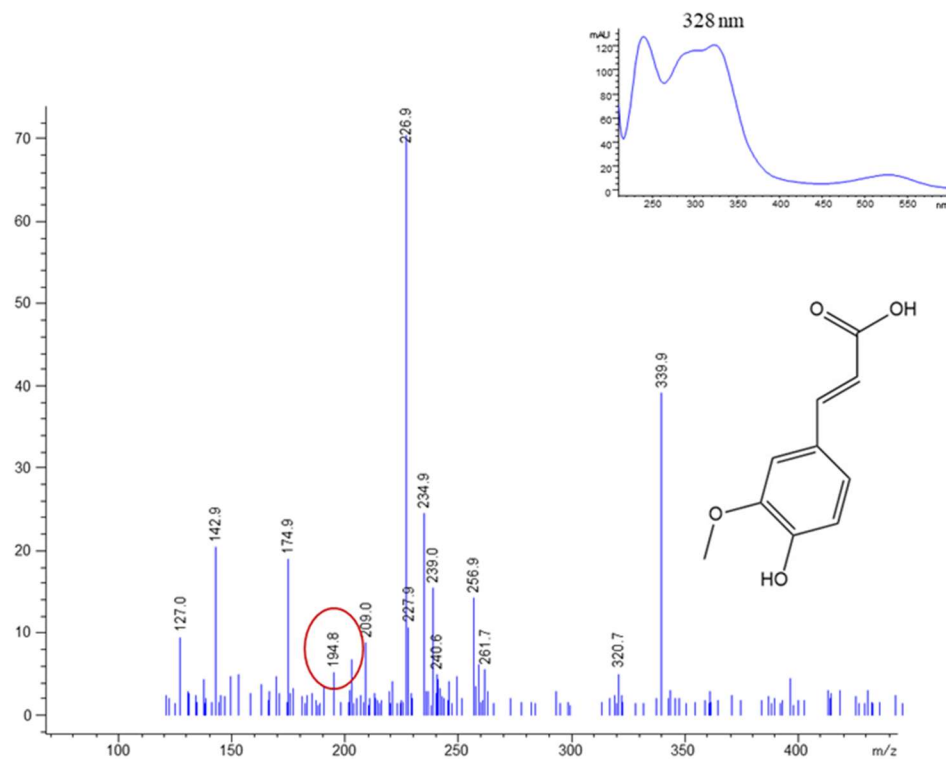

(h) peak 7  
Ferulic acid

**Figure 5.** LC-MS; UV/VIS scanning spectra; chemical structures of black carrot: (a) peak 1, (b) peak 2, (c) peak 3, (d) peak 4, (e) peak 5, (f) peak 6, (g) peak 7, (h) peak 8.
